## 1 **Title**

2 Differential asthma risk following respiratory infection in children from three minority  
3 populations

## 4 **Short Title**

5 Asthma risk following respiratory infection in minority children

## 6 **Authors**

7 Eric M. Wohlford<sup>1</sup>, Luisa N. Borrell<sup>2\*</sup>, Jennifer R. Elhawary<sup>1</sup>, Brian Plotkin<sup>1</sup>, Sam S. Oh<sup>1</sup>,  
8 Thomas J. Nuckton<sup>1</sup>, Celeste Eng<sup>1</sup>, Sandra Salazar<sup>1</sup>, Michael A. LeNoir<sup>3</sup>, Kelley  
9 Meade<sup>4</sup>, Harold J. Farber<sup>5</sup>, Denise Serebrisky<sup>6</sup>, Emerita Brigino-Buenaventura<sup>7</sup>, William  
10 Rodriguez-Cintron<sup>8</sup>, Rajesh Kumar<sup>9</sup>, Shannon Thyne<sup>10</sup>, Max A. Seibold<sup>11</sup>, José R.  
11 Rodriguez-Santana<sup>12</sup>, Esteban G. Burchard<sup>1,13</sup>

## 12 **Author affiliations**

13 1 Department of Medicine, University of California, San Francisco, CA, USA.

14 2 Department of Epidemiology & Biostatistics, Graduate School of Public Health &  
15 Health Policy, City University of New York, New York, NY, USA.

16 3 Bay Area Pediatrics, Oakland, CA, USA.

17 4 Children's Hospital and Research Center Oakland, Oakland, CA, USA.

18 5 Department of Pediatrics, Section of Pulmonology, Baylor College of Medicine and  
19 Texas Children's Hospital, Houston, TX, USA.

20 6 Pediatric Pulmonary Division, Jacobi Medical Center, Bronx, NY, USA.

21 7 Department of Allergy and Immunology, Kaiser Permanente-Vallejo Medical Center,  
22 Vallejo, CA, USA.

23 8 Veterans Caribbean Health Care System, San Juan, Puerto Rico, USA.

24 9 The Ann and Robert H. Lurie Children's Hospital of Chicago, Chicago, IL, USA.

25 10 Department of Pediatrics, University of California, Los Angeles, Los Angeles, CA,  
26 USA.

27 11 National Jewish Health, Denver, CO, USA.

28 12 Centro de Neumologia Pediatrica, Caguas, Puerto Rico, USA.

29 13 Department of Bioengineering and Therapeutic Sciences, University of California,  
30 San Francisco, CA, USA.

## 31 **\* Corresponding author**

32 Email: [Luisa.Borrell@sph.cuny.edu](mailto:Luisa.Borrell@sph.cuny.edu) (LNB)

## 33 **Author Contributions**

34 EGB conceived of and designed the SAGE and GALA II studies. SSO and JRE carried  
35 out formal analyses. SSO and EGB provided supervision and mentorship. SSO, JRE,  
36 BP, LNB, TJN, and EMW wrote the manuscript. LNB carried out epidemiological  
37 analysis. CE and SS oversaw all data curation. MAL, KM, HJF, DS, EB-B, WR-C, RK,  
38 ST, MAS, and JRR-S were all responsible in the provision of patients, samples, and  
39 instrumentation for the SAGE and GALA II studies. All authors reviewed, edited, and  
40 approved of the final manuscript.

## 41 **Conflict of interest statement**

42 The authors declare that they have no relevant conflicts of interest.

## 43 **Funding Sources**

44 This work was supported in part by the Sandler Family Foundation, the American  
45 Asthma Foundation, the RWJF Amos Medical Faculty Development Program, Harry  
46 Wm. and Diana V. Hind Distinguished Professor in Pharmaceutical Sciences II, National  
47 Institutes of Health R01HL117004, R01HL128439, R01HL135156, 1X01HL134589,  
48 R01HL141992, 5T32GM007546, National Institute of Health and Environmental Health  
49 Sciences R01ES015794, R21ES24844, the National Institute on Minority Health and  
50 Health Disparities P60MD006902 RL5GM118984, R01MD010443 and the Tobacco-  
51 Related Disease Research Program under Award Number 24RT-0025, 27IR-0030

## 52 **Word count**

53 2,621

## 54 **Abstract**

### 55 **Rationale**

56 Severe early-life respiratory illnesses, particularly those caused by respiratory syncytial  
57 virus (RSV) and human rhinovirus (HRV), are strongly associated with the development  
58 of asthma in children. Puerto Rican children in particular have a strikingly high asthma  
59 burden, but prior studies of the potential associations between early-life respiratory  
60 illnesses and asthma in Puerto Rican and other minority populations have been limited.

### 61 **Objectives**

62 We sought to determine whether early-life respiratory illness was associated with  
63 asthma in Puerto Rican children relative to other minority children.

### 64 **Methods**

65 Using a logistic regression analysis, we examined the association between early-life  
66 respiratory illnesses (report of upper respiratory infection (URI), pneumonia, bronchitis,  
67 and bronchiolitis/RSV) within the first two years of life and physician-diagnosed asthma  
68 after the age of two in a large cohort of minority children.

### 69 **Measurements and Main Results**

70 Early-life respiratory illnesses were associated with greater asthma risk in Puerto  
71 Ricans relative to other racial/ethnic minority populations. Specifically, in Puerto Ricans,  
72 the odds was 6.15 (95% CI: 4.21-9.05) if the child reported at least one of the following

73 respiratory illness: URI, pneumonia, bronchitis or bronchiolitis. The odds were also  
74 higher in Puerto Ricans when considering these conditions separately.

## 75 **Conclusions**

76 We observe population-specific associations between early-life respiratory illnesses and  
77 asthma, which was especially significant in Puerto Ricans. Taken together with the  
78 known high burden of RSV in Puerto Rico, our results may help explain the high burden  
79 of asthma in Puerto Ricans.

## 80 **Word Count**

81 249

## 82 **Key Words**

83 Puerto Rico, asthma, minority children, health disparity, human respiratory viruses, viral  
84 infection, RSV, African American, Latino.

## 85 **Abbreviations**

86 RSV, respiratory syncytial virus; HRV, human rhinovirus; GALA II, Genes-Environments  
87 and Admixture in Latino Americans; SAGE, The Study of African Americans, Asthma,  
88 Genes and Environments; URI, upper respiratory infection; SES, socioeconomic status

## 89 Introduction

90 Asthma is the most common chronic disease in children[1, 2], with genetic,  
91 environmental, and infectious risk factors.[3-5] Though the global burden of asthma is  
92 increasing, certain racial/ethnic and geographic populations are at especially high risk.  
93 Puerto Ricans are among the most severely affected populations in the world.[4]  
94 Approximately 36.5% of Puerto Ricans report they currently or previously had asthma,  
95 compared to only 13.0% of African Americans, 12.1% of European Americans, and  
96 7.5% of Mexican Americans.[6] These striking differences extend to asthma morbidity  
97 and mortality, which are 2.4- and 4-fold higher in Puerto Ricans compared to whites,  
98 respectively.[6, 7]

99 Several epidemiological studies have established a strong association between the  
100 development of childhood asthma or recurrent wheeze with exposure to severe, early-  
101 life respiratory illnesses across populations.[8-18] Associations with asthma were  
102 strongest for infections caused by respiratory syncytial virus (RSV)[8, 11, 14-18] and  
103 human rhinovirus (HRV).[12-14] Both RSV and HRV are known to cause bronchiolitis,  
104 which can be a severe respiratory infection in children and is linked to later asthma  
105 development.[16, 19] These viruses have a complex interaction between genetics and  
106 environmental exposures in determining risks for asthma and related outcomes.[20, 21]  
107 Additionally, Puerto Rico has an RSV season that is year-round whereas the mainland  
108 United States only reports a 20-week season (**Fig 1**).[22, 23]

109 **Fig 1. Respiratory syncytial virus (RSV) season in Puerto Rico (red) and the**  
110 **mainland United States (blue). RSV season begins when 10% or more of RSV**  
111 **tests are positive.**

112 It is unclear at this time if differential responses to early-life respiratory illnesses  
113 contribute to the striking asthma disparities seen across minority populations. It is  
114 possible that genetic predisposition, environmental influences, and early-life respiratory  
115 illness work together to increase asthma susceptibility in high-risk populations. Our aim  
116 was to investigate the association of early-life respiratory illnesses with asthma  
117 susceptibility seen in our large and well-phenotyped cohort of minority children. In light  
118 of disparate disease prevalence,[6, 22, 23] we examined this association in each  
119 population (Puerto Ricans, African Americans and Mexican Americans), separately and  
120 combined.

## 121 **Methods**

### 122 **Study population**

123 The analysis examined participants recruited through two parent studies: the Genes-  
124 Environments and Admixture in Latino Americans (GALA II) study and the Study of  
125 African Americans, Asthma, Genes and Environments (SAGE), described in detail  
126 elsewhere.[24-26] Briefly, GALA II and SAGE are parallel case-control studies of  
127 asthma conducted between 2006 to 2014 in Latino (Mexican American and Puerto  
128 Rican) and African American children aged 8-21, respectively. SAGE participants were  
129 recruited from the San Francisco Bay Area and GALA II participants were recruited from  
130 across the continental United States (Chicago, Houston, New York City, and the San

131 Francisco Bay Area) and Puerto Rico. Questionnaires were administered to adult  
132 participants and parents of minors. All participants provided consent to being in the  
133 study. Consent was obtained from all adult participants and parent/legal guardians of  
134 minor participants. All participating institutions obtained the appropriate approvals from  
135 their Institutional Review Boards.

136 Out of a total of 6,023, participants with asthma onset prior to the age of two (n=1,450)  
137 and those individuals without complete illness and covariate data (n=2,301) were  
138 excluded from the study. Those diagnosed with asthma before age two were initially  
139 excluded from analysis to better delineate any causal association between early-life  
140 respiratory illness before age two and subsequent diagnosis of asthma. The exclusion  
141 criteria yielded an analytical sample of 2,824 subjects, including both cases (n=1,091)  
142 and controls (n=1,733).

## 143 **Outcomes**

144 The outcome of our study was asthma diagnosed after the age of two by a  
145 physician.[24] Eligible control subjects had no reported history of asthma, lung disease,  
146 or chronic illness, and no reported symptoms of coughing, wheezing, or shortness of  
147 breath in the two years before enrollment.

## 148 **Exposure**

149 The exposure was self-reported early-life respiratory illnesses within the first two years  
150 of life. Early-life respiratory illnesses included upper respiratory infection (URI),  
151 pneumonia, bronchitis, and bronchiolitis/RSV, which were analyzed separately. In



152 addition, the report of at least one of the four previous illnesses was used to categorize  
153 children with “any respiratory illness” and none otherwise.

## 154 **Covariates**

155 Consistent with previous studies,[27, 28] we considered factors known to be associated  
156 with early-life respiratory illnesses and with asthma. These included sex, underweight at  
157 birth (yes/no), maternal smoking during pregnancy (yes/no), whether the subject was  
158 breastfed (yes/no), number of older siblings (none, one, two or more), socioeconomic  
159 status (SES; low, medium, high; described further in **Text A in S1 File**), and recruitment  
160 region; the latter of which was not used in the African American models because all the  
161 participants were recruited from the same region. Global African and European ancestry  
162 estimates (described further in **Text B in S1 File**) were additional covariates used in our  
163 combined model to adjust for the underlying substructure of populations in the dataset.

## 164 **Statistical Analysis**

165 Descriptive statistics were calculated for the overall study population and for each  
166 minority population separately. Logistic regression was used to study the association  
167 between physician-diagnosed asthma and self-reported respiratory illnesses in the first  
168 two years of life. To account for the difference in asthma prevalence[6] and the fact that  
169 ethnicity acts as an effect modifier on the association, we also performed association  
170 tests stratified by population. The statistical programming language R version 3.5.1 was  
171 used to perform all analyses.

## 172 **Data availability**

173 Due to the sensitive nature of the data collected surrounding issues of race,  
174 socioeconomic status, and ancestry, data are available upon request. Access to the  
175 limited dataset used in this study can be arranged by contacting Dr. Esteban Burchard  
176 [email: [esteban.burchard@ucsf.edu](mailto:esteban.burchard@ucsf.edu)]. Of note, any data provided will be stripped of  
177 specific subject identifiers that could be used to identify a specific child and/or his/her  
178 residence. All source code for this analysis can be accessed on our github page  
179 <https://github.com/asthmacollaboratory/asthma-after-RI>.

## 180 **Results**

181 Descriptive characteristics of our final study population are presented in **Table 1**. When  
182 compared with children without asthma, those with asthma were more likely to be male,  
183 to have a mother who smoked during pregnancy, and have lower SES. These  
184 distributions were observed in our sample with a few exceptions. For instance, while  
185 Puerto Rican and Mexican American children without asthma were more likely to be  
186 breastfed than their counterparts with asthma, the opposite was true for African  
187 Americans. Additionally, we found that Puerto Ricans were 4- to 9-fold more likely to  
188 report an RSV infection or bronchiolitis in the first two years of life than Mexican  
189 Americans and African Americans, respectively (**Fig 2**).

190 **Fig 2. Population-specific proportions of selected respiratory illnesses during the**  
191 **first 2 years of life for our study population.**

192 **Table 1.** Descriptive statistics of the final study population (N = 2,824).

|                          | Puerto Rican |      |         |      | Mexican American |      |         |      | African American |      |         |      | Combined |      |         |      |
|--------------------------|--------------|------|---------|------|------------------|------|---------|------|------------------|------|---------|------|----------|------|---------|------|
|                          | Case         |      | Control |      | Case             |      | Control |      | Case             |      | Control |      | Case     |      | Control |      |
|                          | N            | %    | N       | %    | N                | %    | N       | %    | N                | %    | N       | %    | N        | %    | N       | %    |
| Number of subjects       | 284          | 100  | 783     | 100  | 375              | 100  | 504     | 100  | 432              | 100  | 446     | 100  | 1091     | 100  | 1733    | 100  |
| Males                    | 150          | 52.8 | 361     | 46.1 | 212              | 56.5 | 210     | 41.7 | 218              | 50.5 | 187     | 41.9 | 580      | 53.2 | 758     | 43.7 |
| Underweight at birth     | 32           | 11.3 | 61      | 7.8  | 24               | 6.4  | 35      | 6.9  | 36               | 8.3  | 45      | 10.1 | 92       | 8.4  | 141     | 8.1  |
| In-utero smoke exposure  | 14           | 4.9  | 40      | 5.1  | 14               | 3.7  | 9       | 1.8  | 78               | 18.1 | 54      | 12.1 | 106      | 9.7  | 103     | 5.9  |
| Breastfed                | 141          | 49.6 | 432     | 55.2 | 285              | 76   | 401     | 79.6 | 262              | 60.6 | 244     | 54.7 | 688      | 63.1 | 1077    | 62.1 |
| Number of older siblings |              |      |         |      |                  |      |         |      |                  |      |         |      |          |      |         |      |
| 0                        | 74           | 26.1 | 200     | 25.5 | 132              | 35.2 | 195     | 38.7 | 247              | 57.2 | 208     | 46.6 | 453      | 41.5 | 603     | 34.8 |
| 1                        | 92           | 32.4 | 274     | 35   | 138              | 36.8 | 176     | 34.9 | 101              | 23.4 | 132     | 29.6 | 331      | 30.3 | 582     | 33.6 |
| 2 or more                | 118          | 41.5 | 309     | 39.5 | 105              | 28   | 133     | 26.4 | 84               | 19.4 | 106     | 23.8 | 307      | 28.1 | 548     | 31.6 |
| Socioeconomic status*    |              |      |         |      |                  |      |         |      |                  |      |         |      |          |      |         |      |
| high                     | 89           | 31.3 | 271     | 34.6 | 114              | 30.4 | 116     | 23   | 163              | 37.7 | 160     | 35.9 | 366      | 33.5 | 547     | 31.6 |
| medium                   | 51           | 18   | 136     | 17.4 | 79               | 21.1 | 84      | 16.7 | 113              | 26.2 | 137     | 30.7 | 243      | 22.3 | 357     | 20.6 |
| low                      | 144          | 50.7 | 376     | 48   | 182              | 48.5 | 304     | 60.3 | 156              | 36.1 | 149     | 33.4 | 482      | 44.2 | 829     | 47.8 |
| Recruitment region       |              |      |         |      |                  |      |         |      |                  |      |         |      |          |      |         |      |
| Chicago                  | 18           | 6.3  | 23      | 2.9  | 137              | 36.5 | 180     | 35.7 | -                | -    | -       | -    | 155      | 14.2 | 203     | 11.7 |
| Houston                  | 1            | 0.4  | -       | -    | 96               | 25.6 | 91      | 18.1 | -                | -    | -       | -    | 97       | 8.9  | 91      | 5.3  |
| New York                 | 27           | 9.5  | 34      | 4.3  | 20               | 5.3  | 64      | 12.7 | -                | -    | -       | -    | 47       | 4.3  | 98      | 5.7  |
| San Francisco Bay Area   | 1            | 0.4  | 1       | 0.1  | 122              | 32.5 | 169     | 33.5 | 432              | 100  | 446     | 100  | 555      | 50.9 | 616     | 35.5 |
| Puerto Rico              | 237          | 83.5 | 725     | 92.6 | -                | -    | -       | -    | -                | -    | -       | -    | 237      | 21.7 | 725     | 41.8 |
| URI                      | 57           | 20.1 | 35      | 4.5  | 24               | 6.4  | 27      | 5.4  | 67               | 15.5 | 16      | 3.6  | 148      | 13.6 | 78      | 4.5  |
| Pneumonia                | 13           | 4.6  | 5       | 0.6  | 20               | 5.3  | 11      | 2.2  | 24               | 5.6  | 14      | 3.1  | 57       | 5.2  | 30      | 1.7  |
| Bronchitis               | 36           | 12.7 | 10      | 1.3  | 37               | 9.9  | 10      | 2    | 16               | 3.7  | 6       | 1.3  | 89       | 8.2  | 26      | 1.5  |
| Bronchiolitis/RSV        | 31           | 10.9 | 14      | 1.8  | 6                | 1.6  | 4       | 0.8  | 6                | 1.4  | 2       | 0.4  | 43       | 3.9  | 20      | 1.2  |
| Any Listed               | 89           | 31.3 | 54      | 6.9  | 75               | 20   | 46      | 9.1  | 98               | 22.7 | 31      | 7    | 262      | 24   | 131     | 7.6  |

193 \*Socioeconomic status was derived from a combination of mother's education level, health insurance status, and household income  
 194 weighted by region, see **Text A in S1 File** for more information.

195 In the population-specific stratified analyses, we also observed that the odds of asthma  
196 in Puerto Ricans was 5.25 (95% CI: 3.34-8.37) for URI, 7.23 (95% CI: 2.66-23) for  
197 pneumonia, 13 (95% CI: 6.51-28.2) for bronchitis, 7.27 (95% CI: 3.83-14.5) for  
198 bronchiolitis/RSV, and 6.15 (95% CI: 4.21-9.05) if the participant reported having at  
199 least one early-life respiratory illness (**Table 2, Fig 3**). Comparatively, the odds of  
200 asthma in Mexican Americans and African Americans respectively was 2.17 (95% CI:  
201 1.12-4.24) and 4.77 (95% CI: 2.76-8.71) for URI, 2.05 (95% CI: 0.956-4.61) and 1.9  
202 (95% CI: 0.967-3.86) for pneumonia, 4.78 (95% CI: 2.39-10.4) and 2.7 (95% CI: 1.08-  
203 7.71) for bronchitis, 2.01 (95% CI: 0.552-8.15) and 2.9 (95% CI: 0.635-20.4) for  
204 bronchiolitis/RSV, and 3.07 (95% CI: 1.99-4.79) and 3.91 (95% CI: 2.55-6.12) if the  
205 participant reported having at least one early-life respiratory illness (**Table 2, Fig 3**). In  
206 our combined analysis, we observed that the odds of asthma was 4.31 (95% CI: 3.15-  
207 5.96) for URI, 2.66 (95% CI: 1.67-4.3) for pneumonia, 7.04 (95% CI: 4.44-11.6) for  
208 bronchitis, 5.82 (95% CI: 3.26-10.8) for bronchiolitis/RSV, and 4.5 (95% CI: 3.52-5.78) if  
209 the participant reported having at least one early-life respiratory illness (**Table 2, Fig 3**).

210 **Fig 3. Odds ratios plotted on a log scale of the association between early-life**  
211 **respiratory illnesses before the age of two and asthma diagnosis after the age of**  
212 **two across our three main populations and combined.**

213 **Table 2.** Odds ratios and confidence intervals from the population-specific and combined association analysis between respiratory  
 214 illnesses in the first two years of life and physician-diagnosed asthma after the age of two in the three main populations in GALA II  
 215 and SAGE: 2006-2014.

|                   | <b>Puerto Rican<br/>(n=1,067)</b> | <b>Mexican American<br/>(n=879)</b> | <b>African American<br/>(n=878)</b> | <b>Combined<br/>(n=2,824)</b> |
|-------------------|-----------------------------------|-------------------------------------|-------------------------------------|-------------------------------|
| URI               | <b>5.25 (3.34-8.37)</b>           | <b>2.17 (1.12-4.24)</b>             | <b>4.77 (2.76-8.71)</b>             | <b>4.31 (3.15-5.96)</b>       |
| Pneumonia         | <b>7.23 (2.66-23)</b>             | 2.05 (0.956-4.61)                   | 1.9 (0.967-3.86)                    | <b>2.66 (1.67-4.3)</b>        |
| Bronchitis        | <b>13 (6.51-28.2)</b>             | <b>4.78 (2.39-10.4)</b>             | <b>2.7 (1.08-7.71)</b>              | <b>7.04 (4.44-11.6)</b>       |
| Bronchiolitis/RSV | <b>7.27 (3.83-14.5)</b>           | 2.01 (0.552-8.15)                   | 2.9 (0.635-20.4)                    | <b>5.82 (3.26-10.8)</b>       |
| Any Listed        | <b>6.15 (4.21-9.05)</b>           | <b>3.07 (1.99-4.79)</b>             | <b>3.91 (2.55-6.12)</b>             | <b>4.5 (3.52-5.78)</b>        |

216 **BOLD** values are statistically significant at  $p < 0.05$ .

217 To test statistically significant differences in odds ratios between racial/ethnic groups,  
218 we performed a Z-test.[29] We found that there were significant differences ( $p < 0.05$ )  
219 between Puerto Ricans and Mexican Americans for URI and Any Listed, and between  
220 Puerto Ricans and African Americans for bronchitis and pneumonia (**Table A in S2**  
221 **File**).

222 In a separate analysis, we performed these associations including those individuals  
223 diagnosed with asthma before the age of two (**Table B in S2 File**). Our results showed  
224 that all early-life respiratory illnesses were significantly associated ( $p < 0.05$ ) with  
225 asthma diagnosis across our three populations and combined, with the exception of  
226 RSV in Mexican Americans (**Table C in S2 File**). Additionally, Puerto Ricans had a  
227 significantly higher risk of asthma after respiratory infection than Mexican Americans for  
228 every respiratory infection tested (**Table D in S2 File**).

229 We additionally assessed the differential risk of asthma after an early-life respiratory  
230 illness in Puerto Ricans living in Puerto Rico (Islanders) versus those living in the  
231 mainland United States (Mainlanders); descriptive characteristics for these populations  
232 can be found in **Table E in S2 File**. Our data suggest a high asthma risk following early-  
233 life respiratory illness in Islanders relative to Mainlanders (**Table F in S2 File**) though  
234 due to the small number of Mainlanders we were underpowered to detect statistically  
235 significant differences between these groups.

## 236 **Discussion**

237 Overall, we found that early-life respiratory illnesses such as URI, pneumonia,  
238 bronchitis, and bronchiolitis/RSV are significantly associated with asthma diagnosis

239 after the age of two regardless of race/ethnicity. However, Puerto Ricans displayed the  
240 strongest associations.

## 241 **Early-life respiratory illnesses increase risk for physician-** 242 **diagnosed childhood asthma**

243 The association between early-life respiratory illnesses and asthma has been well  
244 documented.[8-18] Yet, little is known about racial/ethnic differences that underlie the  
245 associations between early-life respiratory illnesses and the development of asthma  
246 later on in childhood.

247 Previous research on the association between early-life respiratory infection and the  
248 development of asthma has yielded conflicting results. Having a wheezing illness due to  
249 RSV or HRV infection in early life has previously shown to be associated with a 2.6- and  
250 9.8-fold increase, respectively, in asthma risk by age six in a mostly white  
251 population.[12] Additionally, a recent study found that the severity of the RSV infection  
252 was found to be strongly associated with childhood wheezing at age five in a mostly  
253 white population.[11] However, the vast majority of children infected by respiratory  
254 viruses like RSV do not go on to develop respiratory illnesses like recurrent wheezing  
255 and asthma.[28] Currently, it is unclear why only a minority of children develop asthma  
256 after exposure to an early-life respiratory illness. One plausible explanation is that these  
257 respiratory illnesses alter the airway in early life, which leads to asthma later on in  
258 childhood; previous studies have shown that in adults with asthma, the airway  
259 epithelium is altered in a heterogeneous manner.[30] Another possibility is that children  
260 who are already genetically or environmentally prone to asthma present with early-life

261 respiratory illness as an early manifestation of asthma. Indeed, previous studies have  
262 shown asymptomatic carriage of RSV and rhinovirus in children,[31-33] suggesting a  
263 spectrum of disease which may be affected by underlying asthma predisposition.[34,  
264 35] Our results show that asthma risk increases with early-life respiratory illnesses in all  
265 populations studied, but that the increase is most dramatic in the Puerto Rican  
266 population. These results support previous studies[35-37] that early-life respiratory  
267 illnesses are significantly associated with the development of asthma and asthma-  
268 related outcomes while additionally adding that these associations may vary by region  
269 or population.

## 270 **Puerto Ricans are uniquely burdened compared to other** 271 **groups**

272 Most children who develop respiratory viral infections in early life experience minor  
273 illness, but some develop much more severe illnesses that involve lower respiratory  
274 symptoms like wheezing.[9, 10, 31] These more severe wheezing illnesses at an early  
275 stage in life are associated with a high risk for recurrent wheezing and asthma later in  
276 childhood,[12, 13] particularly if these wheezing illnesses were caused by RSV or  
277 HRV.[8, 11, 15-18] Puerto Rican children are especially at risk due to the year-round  
278 seasonality of RSV infections.[22, 23] In fact, 1,406 cases of bronchiolitis/RSV were  
279 reported in children with a mean age of seven months from six Puerto Rican hospitals  
280 over a period of nine months.[34] Our results showed that not only is the prevalence of  
281 bronchiolitis/RSV infection highest in Puerto Rican children in our study population, but  
282 that the risk for asthma among children who have experienced a bronchiolitis/RSV



283 infection in early life is the highest for Puerto Rican Islanders. These observations  
284 suggest that the burden of childhood asthma after bronchiolitis/RSV is particularly high  
285 Puerto Rican children.

286 In our analysis of children diagnosed with asthma after two years of age, some  
287 confidence intervals were too wide to make definitive conclusions regarding the relative  
288 risk of asthma after infection in different racial/ethnic groups. However, when we  
289 included those children diagnosed with asthma before two years of age, the increased  
290 sample size allowed us to better delineate the association between different respiratory  
291 infections and asthma development as stratified by racial/ethnic group. Interestingly,  
292 although Puerto Ricans and Mexican Americans are both considered Hispanic/Latino  
293 for pulmonary function testing and other health metrics, these populations had widely  
294 divergent risks of asthma after early-life respiratory infections. Puerto Ricans  
295 consistently had higher risk of asthma after all respiratory infections studied. Whether  
296 the association between early-life respiratory infection and increased asthma risk is  
297 causal of the alarmingly high rate of asthma in Puerto Ricans requires further study.

298 While we are not able to draw definitive conclusions about the relative risk of asthma  
299 after respiratory infection in Puerto Rican Islanders versus Mainlanders due to the  
300 limited number of mainland US Puerto Rican patients studied, we find it interesting that  
301 Islander Puerto Ricans tended to have a lower risk of asthma after respiratory infections  
302 relative to Islanders. This may suggest an environmental effect about living in Puerto  
303 Rico that affects asthma risk. Further studies on Puerto Ricans living on the island and  
304 in the mainland US can help clarify this observation.

## 305 **Strengths and limitations**

306 Our study may have been limited because the majority (71%) of Puerto Ricans in the  
307 GALA study were diagnosed with asthma before the age of two. In contrast, only 35% of  
308 Mexican Americans, and 50% of African Americans were diagnosed with asthma before  
309 two years old. Our secondary analysis including children diagnosed with asthma before  
310 two years of age addressed these differences. Additionally, our exposure  
311 measurements were determined retrospectively, which may introduce biases in the  
312 data. This study was underpowered to detect any significant associations of early-life  
313 respiratory illnesses on asthma in Puerto Rican Mainlanders versus Puerto Rican  
314 Islanders, and we were not able to determine whether the year-round RSV prevalence  
315 in Puerto Rico modified the effect of the association between respiratory illnesses and  
316 asthma. However, our study outlines that there are clear population-specific differences  
317 in asthma susceptibility across a variety of respiratory illnesses using a large cohort of  
318 minority children from three distinct populations. Our study also benefits from the wide  
319 range of clinical, social, and genetic data available on these patients.

## 320 **Conclusion**

321 Early-life respiratory illnesses such as RSV, which is highly prevalent in Puerto Ricans,  
322 have previously been associated with asthma. Our results indicate that early-life  
323 respiratory infections are particularly associated with the later development of asthma  
324 among Puerto Rican children compared to other populations.

325

## 326 **Acknowledgements**

327 The authors acknowledge the families and patients for their participation and thank the  
328 numerous health care providers and community clinics for their support and  
329 participation in GALA II / SAGE. In particular, the authors thank study coordinator  
330 Sandra Salazar; the recruiters who obtained the data: Duanny Alva, MD, Gaby Ayala-  
331 Rodríguez, Lisa Caine, Elizabeth Castellanos, Jaime Colón, Denise DeJesus, Blanca  
332 López , Brenda López, MD, Louis Martos, Vivian Medina, Juana Olivo, Mario Peralta,  
333 Esther Pomares, MD, Jihan Quraishi, Johanna Rodríguez, Shahdad Saeedi, Dean  
334 Soto, Ana Taveras.

## 335 **References**

- 336 1. Asthma. World Health Organization (WHO). [Available from:  
337 <http://www.who.int/respiratory/asthma/en/>].
- 338 2. Bloom B, Cohen RA, Freeman G. Summary health statistics for U.S. children:  
339 National Health Interview Survey, 2009. *Vital Health Stat* 10. 2010(247):1-82.
- 340 3. Aligne CA, Auinger P, Byrd RS, Weitzman M. Risk factors for pediatric asthma.  
341 Contributions of poverty, race, and urban residence. *Am J Respir Crit Care Med*.  
342 2000;162(3 Pt 1):873-7.
- 343 4. Oh SS, White MJ, Gignoux CR, Burchard EG. Making Precision Medicine  
344 Socially Precise. Take a Deep Breath. *Am J Respir Crit Care Med*. 2016;193(4):348-50.
- 345 5. Subbarao P, Mandhane PJ, Sears MR. Asthma: epidemiology, etiology and risk  
346 factors. *CMAJ*. 2009;181(9):E181-90.
- 347 6. Barr RG, Aviles-Santa L, Davis SM, Aldrich TK, Gonzalez F, 2nd, Henderson  
348 AG, et al. Pulmonary Disease and Age at Immigration among Hispanics. Results from  
349 the Hispanic Community Health Study/Study of Latinos. *Am J Respir Crit Care Med*.  
350 2016;193(4):386-95.
- 351 7. Akinbami LJ. Asthma Prevalence, Health Care Use and Mortality: United States,  
352 2003-05: Center for Disease Control and Prevention: National Center for Health  
353 Statistics; 2010 [Available from: [https://www.cdc.gov/nchs/data/hestat/asthma03-](https://www.cdc.gov/nchs/data/hestat/asthma03-05/asthma03-05.htm)  
354 [05/asthma03-05.htm](https://www.cdc.gov/nchs/data/hestat/asthma03-05/asthma03-05.htm)].

- 355 8. Bacharier LB, Cohen R, Schweiger T, Yin-Declue H, Christie C, Zheng J, et al.  
356 Determinants of asthma after severe respiratory syncytial virus bronchiolitis. *J Allergy*  
357 *Clin Immunol.* 2012;130(1):91-100 e3.
- 358 9. Castro-Rodriguez JA, Forno E, Rodriguez-Martinez CE, Celedon JC. Risk and  
359 Protective Factors for Childhood Asthma: What Is the Evidence? *J Allergy Clin Immunol*  
360 *Pract.* 2016;4(6):1111-22.
- 361 10. Castro-Rodriguez JA, Holberg CJ, Wright AL, Martinez FD. A clinical index to  
362 define risk of asthma in young children with recurrent wheezing. *Am J Respir Crit Care*  
363 *Med.* 2000;162(4 Pt 1):1403-6.
- 364 11. Escobar GJ, Masaquel AS, Li SX, Walsh EM, Kipnis P. Persistent recurring  
365 wheezing in the fifth year of life after laboratory-confirmed, medically attended  
366 respiratory syncytial virus infection in infancy. *BMC Pediatr.* 2013;13:97.
- 367 12. Jackson DJ, Gangnon RE, Evans MD, Roberg KA, Anderson EL, Pappas TE, et  
368 al. Wheezing rhinovirus illnesses in early life predict asthma development in high-risk  
369 children. *Am J Respir Crit Care Med.* 2008;178(7):667-72.
- 370 13. Kusel MM, de Klerk NH, Keadze T, Vohma V, Holt PG, Johnston SL, et al.  
371 Early-life respiratory viral infections, atopic sensitization, and risk of subsequent  
372 development of persistent asthma. *J Allergy Clin Immunol.* 2007;119(5):1105-10.
- 373 14. Lemanske RF, Jr., Jackson DJ, Gangnon RE, Evans MD, Li Z, Shult PA, et al.  
374 Rhinovirus illnesses during infancy predict subsequent childhood wheezing. *J Allergy*  
375 *Clin Immunol.* 2005;116(3):571-7.

- 376 15. Sigurs N. Epidemiologic and clinical evidence of a respiratory syncytial virus-  
377 reactive airway disease link. *Am J Respir Crit Care Med.* 2001;163(3 Pt 2):S2-6.
- 378 16. Sigurs N, Bjarnason R, Sigurbergsson F, Kjellman B. Respiratory syncytial virus  
379 bronchiolitis in infancy is an important risk factor for asthma and allergy at age 7. *Am J*  
380 *Respir Crit Care Med.* 2000;161(5):1501-7.
- 381 17. Sigurs N, Bjarnason R, Sigurbergsson F, Kjellman B, Bjorksten B. Asthma and  
382 immunoglobulin E antibodies after respiratory syncytial virus bronchiolitis: a prospective  
383 cohort study with matched controls. *Pediatrics.* 1995;95(4):500-5.
- 384 18. Sigurs N, Gustafsson PM, Bjarnason R, Lundberg F, Schmidt S, Sigurbergsson  
385 F, et al. Severe respiratory syncytial virus bronchiolitis in infancy and asthma and  
386 allergy at age 13. *Am J Respir Crit Care Med.* 2005;171(2):137-41.
- 387 19. Jartti T, Korppi M. Rhinovirus-induced bronchiolitis and asthma development.  
388 *Pediatr Allergy Immunol.* 2011;22(4):350-5.
- 389 20. Caliskan M, Bochkov YA, Kreiner-Moller E, Bonnelykke K, Stein MM, Du G, et al.  
390 Rhinovirus wheezing illness and genetic risk of childhood-onset asthma. *N Engl J Med.*  
391 2013;368(15):1398-407.
- 392 21. Voraphani N, Stern DA, Wright AL, Guerra S, Morgan WJ, Martinez FD. Risk of  
393 current asthma among adult smokers with respiratory syncytial virus illnesses in early  
394 life. *Am J Respir Crit Care Med.* 2014;190(4):392-8.

- 395 22. McGuinness CB, Boron ML, Saunders B, Edelman L, Kumar VR, Rabon-Stith KM.  
396 Respiratory syncytial virus surveillance in the United States, 2007-2012: results from a  
397 national surveillance system. *Pediatr Infect Dis J*. 2014;33(6):589-94.
- 398 23. Molinari Such M, Garcia I, Garcia L, Puig G, Pedraza L, Marin J, et al.  
399 Respiratory syncytial virus-related bronchiolitis in Puerto Rico. *P R Health Sci J*.  
400 2005;24(2):137-40.
- 401 24. Nishimura KK, Galanter JM, Roth LA, Oh SS, Thakur N, Nguyen EA, et al. Early-  
402 life air pollution and asthma risk in minority children. The GALA II and SAGE II studies.  
403 *Am J Respir Crit Care Med*. 2013;188(3):309-18.
- 404 25. Oh SS, Tcheurekdjian H, Roth LA, Nguyen EA, Sen S, Galanter JM, et al. Effect  
405 of secondhand smoke on asthma control among black and Latino children. *J Allergy*  
406 *Clin Immunol*. 2012;129(6):1478-83 e7.
- 407 26. Thakur N, Oh SS, Nguyen EA, Martin M, Roth LA, Galanter J, et al.  
408 Socioeconomic status and childhood asthma in urban minority youths. The GALA II and  
409 SAGE II studies. *Am J Respir Crit Care Med*. 2013;188(10):1202-9.
- 410 27. Gillman MW, Barker D, Bier D, Cagampang F, Challis J, Fall C, et al. Meeting  
411 report on the 3rd International Congress on Developmental Origins of Health and  
412 Disease (DOHaD). *Pediatr Res*. 2007;61(5 Pt 1):625-9.
- 413 28. Pullan CR, Hey EN. Wheezing, asthma, and pulmonary dysfunction 10 years  
414 after infection with respiratory syncytial virus in infancy. *Br Med J (Clin Res Ed)*.  
415 1982;284(6330):1665-9.

- 416 29. Genome Toolbox. Test for a Difference in Two Odds Ratios 2014 [Available from:  
417 <http://genometoolbox.blogspot.com/2014/06/test-for-difference-in-two-odds-ratios.html>.
- 418 30. Bai J, Smock SL, Jackson GR, Jr., Maclsaac KD, Huang Y, Mankus C, et al.  
419 Phenotypic responses of differentiated asthmatic human airway epithelial cultures to  
420 rhinovirus. PLoS One. 2015;10(2):e0118286.
- 421 31. Global Initiative for Asthma. Global Strategy for Asthma Management and  
422 Prevention 2017 [Available from: [www.ginasthma.org](http://www.ginasthma.org).
- 423 32. Jansen RR, Wieringa J, Koekkoek SM, Visser CE, Pajkrt D, Molenkamp R, et al.  
424 Frequent detection of respiratory viruses without symptoms: toward defining clinically  
425 relevant cutoff values. J Clin Microbiol. 2011;49(7):2631-6.
- 426 33. Munywoki PK, Koech DC, Agoti CN, Bett A, Cane PA, Medley GF, et al.  
427 Frequent Asymptomatic Respiratory Syncytial Virus Infections During an Epidemic in a  
428 Rural Kenyan Household Cohort. J Infect Dis. 2015;212(11):1711-8.
- 429 34. Matias I, Garcia I, Garcia-Fragoso L, Puig G, Pedraza L, Rodriguez L, et al.  
430 Trends of Respiratory Syncytial Virus Infections in Children under 2 Years of Age in  
431 Puerto Rico. P R Health Sci J. 2015;34(2):98-101.
- 432 35. Wennergren G, Kristjansson S. Relationship between respiratory syncytial virus  
433 bronchiolitis and future obstructive airway diseases. Eur Respir J. 2001;18(6):1044-58.



- 434 36. Burchard EG, Ziv E, Coyle N, Gomez SL, Tang H, Karter AJ, et al. The  
435 importance of race and ethnic background in biomedical research and clinical practice.  
436 N Engl J Med. 2003;348(12):1170-5.
- 437 37. Szentpetery SE, Forno E, Canino G, Celedon JC. Asthma in Puerto Ricans:  
438 Lessons from a high-risk population. J Allergy Clin Immunol. 2016;138(6):1556-8.

439 **Supplemental Information**

440 **S1 File. Derivation of variables.** Text A-B.

441 **S2 File. Supplemental tables.** Tables A-F.

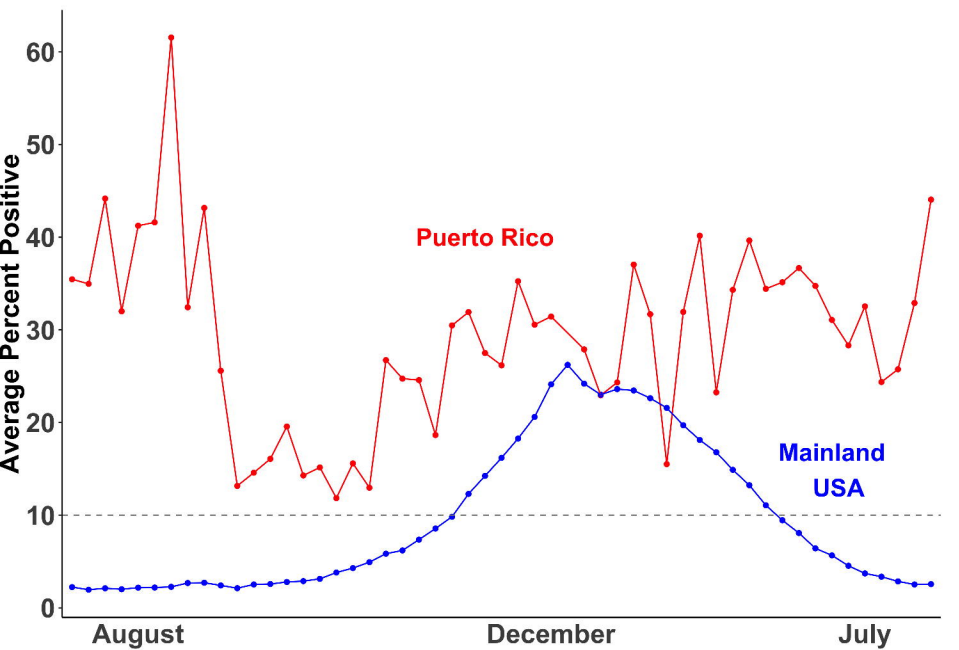

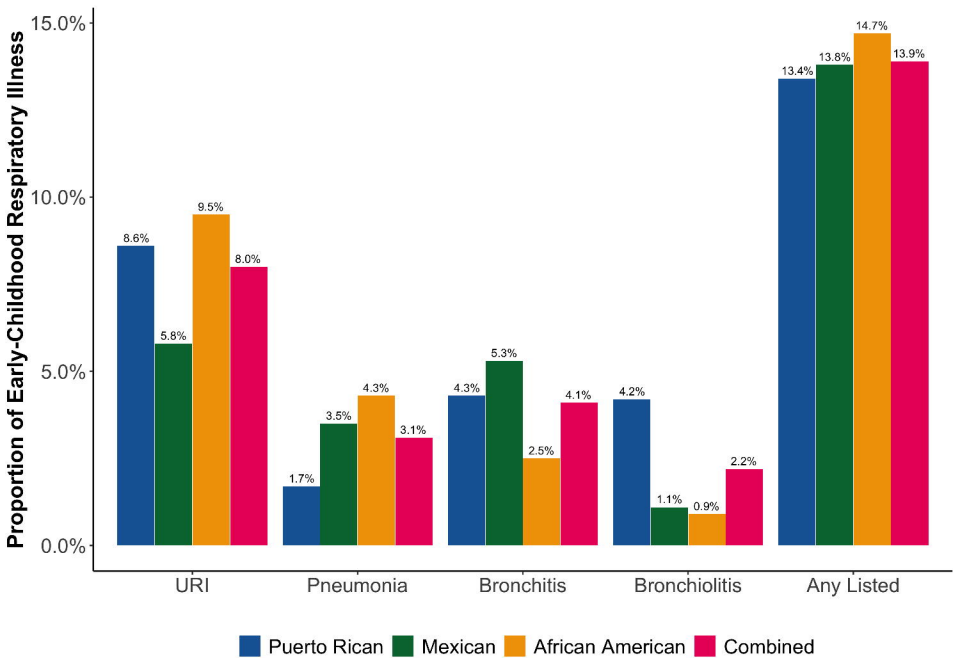

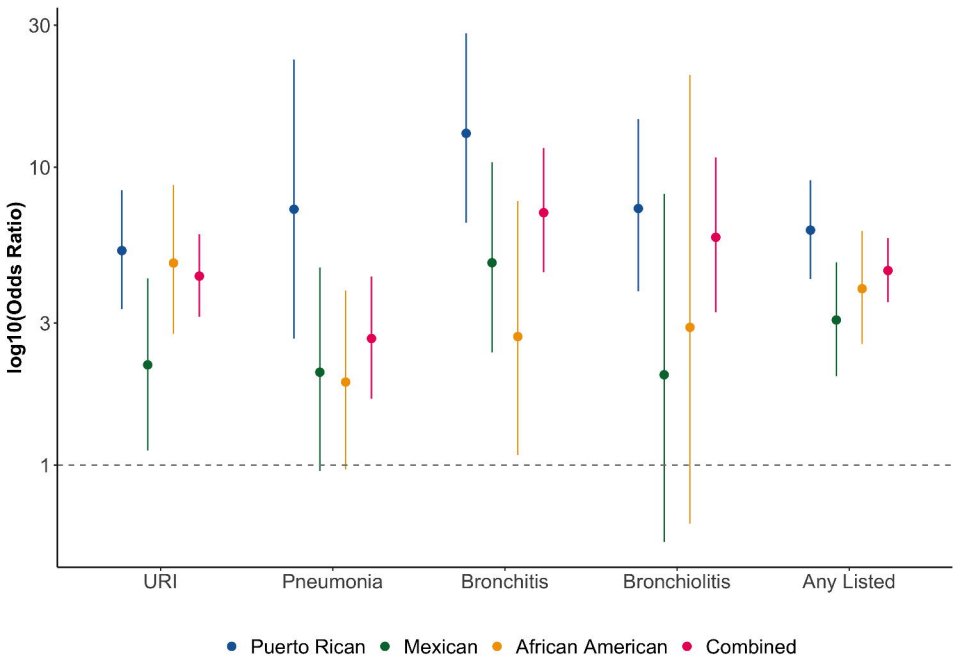

Source: https://medrxiv.org/content/medrxiv/early/2019/11/22/19011528.full.pdf
